# Supplementary material for: SIRT1 regulates the phosphorylation and degradation of P27 by deacetylating CDK2 to promote T-cell acute lymphoblastic leukemia progression
Source: Springer Nature journal article supplement (doi:10.1186/s13046-021-02071-w), 2021-08-18

a

SIRT1 original sequence

```
attcagtgatggttcctttgcaacagcatct
360                               365                               370
Ile Gln Cys His Gly Ser Phe Ala Thr Ala Ser
```

SIRT1 H363Y sequence

```
ATTCAGTGTATGGTTTCCTTTGCAACAGCATCT
Ile Gln Cys Tyr Gly Ser Phe Ala Thr Ala Ser
```

Sanger sequencing result

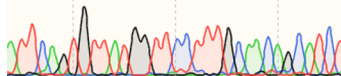

b

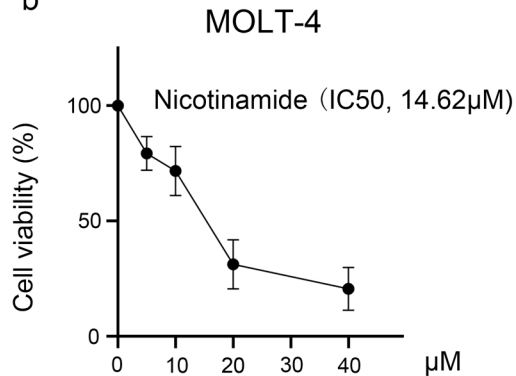

c

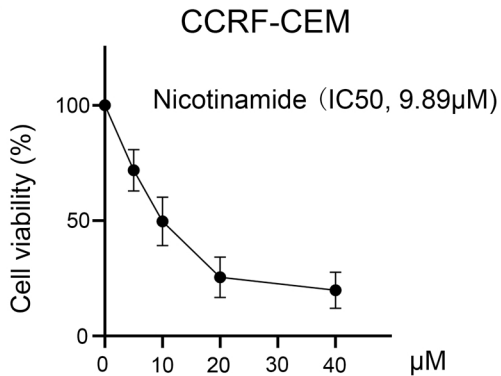

Supplement: MOESM3 [file 19579920]
