# Supplementary material for: SIRT1 regulates the phosphorylation and degradation of P27 by deacetylating CDK2 to promote T-cell acute lymphoblastic leukemia progression
Source: Springer Nature journal article supplement (doi:10.1186/s13046-021-02071-w), 2021-08-18

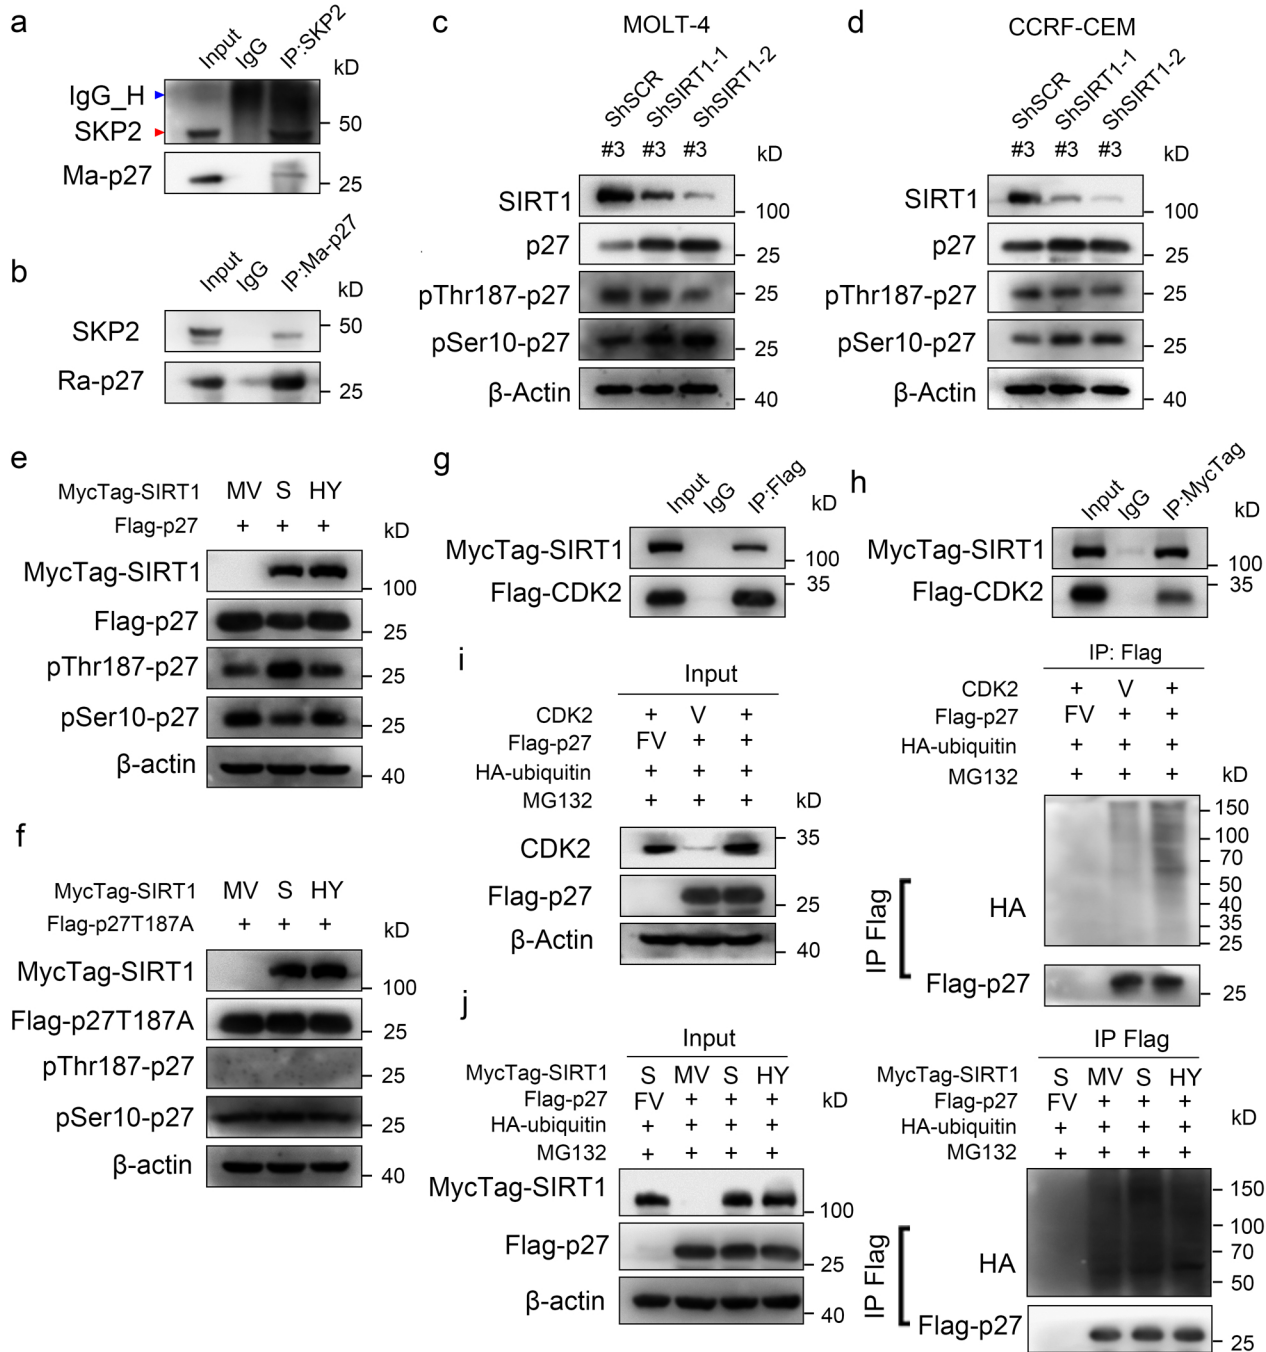

Supplement: MOESM7 [file 19579920]
